# Supplementary material for: Hierarchical Bi2Se3 microrods: microwave-assisted synthesis, growth mechanism and their related properties
Source: Royal Society of Chemistry journal article supplement (doi:10.1039/c2ce26678d), 2012-12-07
Supplement: c2ce26678d.pdf [file c2ce26678d.pdf]

## Electronic Supplementary Information

Hierarchical  $\text{Bi}_2\text{Se}_3$  microrods: microwave-assisted synthesis,  
growth mechanism, and their related properties

Haiming Xu, Gang Chen,\* Rencheng Jin, Jian Pei, Yu Wang and Dahong Chen

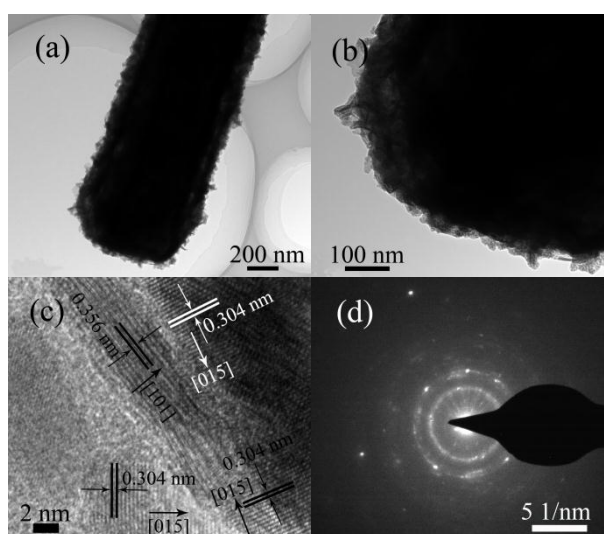

Fig. S1. (a) low magnification TEM, (b) high magnification TEM, (c) HATTEM images and (d) SAED pattern of the samples prepared by microwave-assisted heating at 160°C for 3 min time interval.

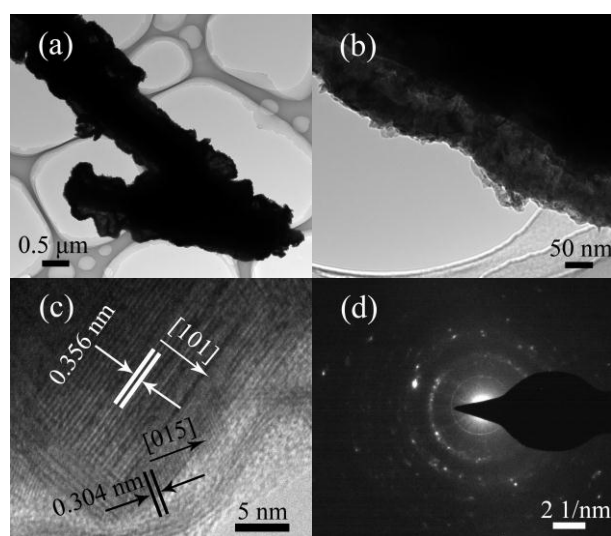

Fig. S2. (a) low magnification TEM, (b) high magnification TEM, (c) HATEM images and (d) SAED pattern of the samples prepared by microwave-assisted heating at 160°C for 10 min time interval.
